# Supplementary material
Source: publisher figshare collection journal article supplement (https://acs.figshare.com/ndownloader/files/10663966)
Supplement: Supplementary file 1 [file 10663966]

1,3,5-Triphospha-1,4-pentadiene-2,4-diamine reacts with  $[M(CO)_4L]$  ( $M = Mo$ ,  $L = nbd$  (norbornadiene);  $M = W$ ,  $L = 2 CH_3CN$ ) to give the chelate complexes  $[M(CO)_4(PMes\{C(NHCy)PMes\}_2-\kappa P^1, P^3)]$ . In contrast, an unusual intramolecular rearrangement occurred with  $[Cu(CH_3CN)_4]PF_6$  leading to the dimeric copper(I) complex  $[Cu(CNCy)\{PMesPMesC(NHCy)PMes-\kappa P^1, P^3\}]_2(PF_6)_2$ . The mechanism of the rearrangement was supported by quantum mechanical calculations. The transition metal complexes were characterized by multinuclear NMR spectroscopy, mass spectrometry, infrared spectroscopy and X-ray crystallography.
